# 1 Choosing priors in Bayesian ecological models by simulating from 2 the prior predictive distribution

3  
4 *Jeff S. Wesner and Justin P.F. Pomeranz*

5 University of South Dakota, Department of Biology, Vermillion, SD 57069

6 [Jeff.Wesner@usd.edu](mailto:Jeff.Wesner@usd.edu)

7 Keywords: *Bayesian, prior predictive distribution, GLMM, simulation*

## 8 **Abstract**

9 Bayesian data analysis is increasingly used in ecology, but prior specification remains focused on choosing  
10 non-informative priors (e.g., flat or vague priors). One barrier to choosing more informative priors is that  
11 priors must be specified on model parameters (e.g., intercepts, slopes, sigmas), but prior knowledge often  
12 exists on the level of the response variable. This is particularly true for common models in ecology, like gen-  
13 eralized linear mixed models, which may have a link function and dozens of parameters, each of which needs  
14 a prior distribution. We suggest that this difficulty can be overcome by simulating from the prior predictive  
15 distribution and visualizing the results on the scale of the response variable. In doing so, some common  
16 choices for non-informative priors on parameters can easily be seen to produce biologically impossible values  
17 of response variables. Such implications of prior choices are difficult to foresee without visualization. We  
18 demonstrate a workflow for prior selection using simulation and visualization with two ecological examples  
19 (predator-prey body sizes and spider responses to food competition). This approach is not new, but its adop-  
20 tion by ecologists will help to better incorporate prior information in ecological models, thereby maximizing  
21 one of the benefits of Bayesian data analysis.

## 22 Introduction

23 The distinguishing feature between Bayesian and non-Bayesian statistics is that Bayesian statistics treats  
24 unknown parameters as random variables governed by a probability distribution, while non-Bayesian statis-  
25 tics treats unknown parameters as fixed (Ellison and Dennis 2010, Hobbs and Hooten 2015). A common  
26 misconception is that only Bayesian statistics incorporates prior information. However, non-Bayesian meth-  
27 ods can and often do incorporate prior information, either informally in the choices of likelihoods and model  
28 structures, or formally as penalized likelihood or hierarchical modeling (Hobbs and Hooten 2015, Morris et  
29 al. 2015).

30 While prior information is not unique to Bayesian models, it is required of them. For example, in a simple  
31 linear regression of the form  $y \sim N(\alpha + \beta x, \sigma)$ , the intercept  $\alpha$ , slope  $\beta$ , and error  $\sigma$  are unknown parameters  
32 that need a prior probability distribution. There are differing opinions and philosophies on the best practices  
33 for choosing priors (Lindley 1961, Edwards et al. 1963, Morris et al. 2015, Wolf et al. 2017, Lemoine 2019,  
34 Banner et al. 2020, Gelman et al. 2017). In ecology, a common practice is to assign so-called non-informative  
35 priors that effectively assign equal probability to all possible values using either uniform or diffuse normal  
36 priors with large variances (Lemoine 2019). These priors allow Bayesian inference to proceed (i.e. produce  
37 a posterior distribution), but with presumably limited influence of the priors (Gelman et al. 2013, Lemoine  
38 2019).

39 Reasons for using non-informative priors are varied but are at least in part driven by a desire to avoid the  
40 appearance of subjectivity and/or a reliance on default settings in popular software (Gelman and Hennig 2017,  
41 Banner et al. 2020). There are several current arguments against this approach. First, “non-informative”  
42 is a misnomer. All priors influence the posterior distribution to some extent (Hobbs and Hooten 2015). As  
43 a result, a prior cannot just be assumed as non-informative based on default settings or a wide variance  
44 (Seaman III et al. 2012). Its implications for the model should be checked just like any other subjective  
45 assumption in data analysis, whether Bayesian or not (Banner et al. 2020, Gelman et al. 2017). Second,  
46 adhering to non-informative priors removes a major potential benefit of Bayesian analysis, which is to  
47 explicitly incorporate prior research and expertise into new science (Hobbs and Hooten 2015, Lemoine 2019,  
48 Rodhouse et al. 2019). Third, informative priors can help to reduce spurious conclusions due to errors  
49 in magnitude or sign of an effect by treating extreme values in the data skeptically (Gelman et al. 2012,  
50 Lemoine 2019). Finally, informative priors make computational algorithms like MCMC run more efficiently,  
51 which can save hours or days of computing time in complex models (Hobbs and Hooten 2015).

52 However, while there are clear arguments for why ecologists *should* use more informative priors, it is often  
53 difficult to know *how* to use them. Even for seemingly simple and routine models, like logistic regression,

54 it can be difficult to understand *a priori* how priors affect the model, because they must be assigned in  
55 the context of likelihood with a linearizing link-function (Seaman III et al. 2012, Gelman et al. 2017).  
56 In other words, prior specification takes place on model parameters (e.g., slopes, intercepts, variances),  
57 but prior knowledge is often easier to assess on the model outcomes (Kadane et al. 1980, Bedrick et al.  
58 1996, Gabry et al. 2019). This is particularly true for the types of models that are commonly used in  
59 ecology, such as generalized linear mixed models with interactions, which may have dozens of parameters  
60 and hyperparameters, each of which require a prior probability distribution (Bedrick et al. 1996, McElreath  
61 2020).

62 We suggest that ecologists can address this problem using simulation from the prior predictive distribution  
63 and visualizing the implications of the priors on either the expected mean of the data (e.g., simulate regression  
64 lines or group means) (Kadane et al. 1980, Bedrick et al. 1996) or by simulating individual data points  
65 (Gabry et al. 2019). In this paper, we demonstrate this approach using two case studies with ecological  
66 data. All data and code for these examples, as well as additional case studies, are available at: [https://github.com/jswesner/prior\\_predictive](https://github.com/jswesner/prior_predictive).  
67

### 68 *Prior Predictive Simulation*

69 An attractive feature of the Bayesian approach is that the models are generative. This means that we  
70 can simulate potential data from the model so long as the parameters are assigned a proper probability  
71 distribution (Gelman et al. 2013). This feature is routinely used to check models and prior influence *after*  
72 fitting the data using the posterior predictive distribution (Lemoine 2019, Gelman et al. 2020), but it can  
73 also be used before seeing the data using the prior predictive distribution (Gabry et al. 2019). As an  
74 example, consider a simple linear regression:

$$y_i \sim N(\mu_i, \sigma) \tag{1}$$

$$\mu_i = \alpha + \beta x_i \tag{2}$$

$$\alpha \sim N(\mu_\alpha, \sigma_\alpha) \tag{3}$$

$$\beta \sim N(\mu_\beta, \sigma_\beta) \tag{4}$$

$$\sigma \sim Exponential(\phi) \tag{5}$$

$$\tag{6}$$

75 where  $y_i$  is the response variable on the  $i^{th}$  row, normally distributed with an unknown mean  $\mu_i$  and standard

76 deviation  $\sigma$ . We assume that the response variable is a linear function of the predictor variable  $x_i$  using a  
77 linear equation with an intercept  $\alpha$  and a slope  $\beta$ . The following parameters need priors:  $\sigma, \alpha, \beta$ . The first  
78 step is to choose a probability distribution for each prior. We chose normal (i.e. Gaussian) distributions for  
79  $\alpha$  and  $\beta$  and an exponential distribution for  $\sigma$ . The normal distributions imply that the intercept or slope  
80 are continuous and can be positive or negative (Hobbs and Hooten 2015). The exponential distribution is a  
81 common prior for standard deviations because it generates only positive values and allows for occasionally  
82 large deviations. For standard deviations (or variances or precisions), there are a number of alternatives  
83 prior distributions available (Gelman and others 2006, Gelman et al. 2013, McElreath 2020).

84 The challenge is to assign prior values to the mean and sd of each normal distribution and to  $\phi$  of the  
85 exponential distribution before seeing the data  $y_i$ . One way to do that is to use prior parameter estimates  
86 from previous studies (Rodhouse et al. 2019). For example, if previous studies found that the slope  $\beta$  was  
87 typically 1.2 with a standard deviation of 0.5 for  $\sigma_\beta$ , then we could use  $\beta \sim N(1.2, 0.5)$  as the prior for  
88 this parameter. Similarly, if other studies suggested that the residuals were described by an exponential  
89 distribution with a rate parameter  $\phi$  of 0.34, then we could use that here.

90 In our experience it is more common that the current study might differ slightly from previous studies, either  
91 in the experimental design, the spatial scale, the species used, or the inclusion of additional covariates. Those  
92 differences make it more difficult to use a posterior distribution of a parameter from one model as a prior  
93 distribution in another model. Simulation offers a practical approach here.

94 The general workflow for prior predictive simulation is:

- 95 1) Draw N values from different prior distributions. (e.g.,  $\alpha_{sim} \sim N(0, 100), \beta_{sim} \sim N(0, 10), \dots, \sigma \sim exp(0.1)$ )
- 96 2) For each draw, solve the equation for each  $i$  value of  $x$ . (e.g.,  $\mu_i = \alpha + \beta x_i$ )
- 97 3) Plot the result for either  $\mu_i, y_i$ , or another derived quantity. (e.g.,  $y_i \sim \tilde{N}(\mu_i, \sigma)$ )
- 98 4) Use our domain knowledge (or another expert's) to assess whether the simulated values reflect prior  
99 knowledge.
- 100 5) If simulated values do not reflect prior knowledge, change the prior distribution, likelihood, or both  
101 and repeat the simulation from step 1.
- 102 6) If simulated values reflect prior knowledge, add the data and estimate the posterior distribution.

103 This amounts to a prior predictive check to satisfy the expectation that “simulations from the full Bayesian  
104 model... should be plausible data sets” (Kennedy et al. 2019). The simulation and visualization steps (1-3)  
105 are critical, because simulated data sets are derived from the *joint distribution* of parameters. In other words,  
106 whether a model simulates plausible data data cannot be determined simply from looking at the individual

107 priors or model formula, because their interpretation depends on the units of measurement (e.g., a  $N(0,1)$   
108 prior means different things if  $y$  is measure in  $\mu\text{m}$  versus  $\text{km}$ ) and on the range of prior expected values. For  
109 step 5, it is important to emphasize that there is no precise definition for what “reflects prior knowledge”.  
110 The purpose of prior simulation is not to pre-determine an outcome, but instead to make explicit exactly  
111 how and why the priors were chosen. The importance of those priors on posterior inference should still be  
112 assessed, but that topic is beyond the scope of this paper. We demonstrate prior predictive simulation below  
113 with two motivating examples.

## 114 **Motivating Examples**

### 115 **Example 1: Predator-Prey Body Sizes - Simple Linear Regression**

#### 116 *Data*

117 Understanding predator-prey interactions has long been a research interest of ecologists. Body size is related  
118 to a number of aspects that influence these interactions. For example, predators are often gape-limited,  
119 meaning that larger predators should be able to eat larger prey. The data set of (Brose et al. 2006)  
120 documents over 10,000 predator-prey interactions, including the mean mass of each.

#### 121 *Model*

122 For this example, we examine the hypothesis that the mean prey body mass increases log-linearly with  
123 predator body mass using a simple linear model:

$$\log(y_i) \sim N(\mu_i, \sigma) \quad (7)$$

$$\mu_i = \alpha + \beta \log(x_i) \quad (8)$$

$$\alpha \sim \text{Normal}(0, \sigma_\alpha) \quad (9)$$

$$\beta \sim \text{Normal}(0, \sigma_\beta) \quad (10)$$

$$\sigma \sim \text{Exponential}(\phi) \quad (11)$$

124 where  $\log(y_i)$  is natural log transformed prey mass and  $\log(x_i)$  is natural log transformed predator mass.

#### 125 *Priors*

126 For the  $\alpha$  and  $\beta$  priors, we need to specify a mean and standard deviation. As a first guess, we assign a  
127 mean of 0 with a “non-informative” standard deviation of 1000 [ $N(0, 1000)$ ]. The mean of 0 in a normal  
128 distribution implies that the intercept and slope have equal probability of being positive or negative. For

129 the standard deviation, a rule of thumb is to assume that reasonable values can be anywhere between  $\pm$   
130 twice the standard deviation (McElreath 2020). There is nothing special about this prior *per se*, but it was a  
131 common default setting in earlier Bayesian software to generate “flat” prior distributions (usually specified as  
132 a precision rather than a standard deviation) and appears regularly in the literature (McCarthy and Masters  
133 2005, Banner et al. 2020). Similarly, for the exponential distribution, smaller rates  $\phi$  generate larger  
134 deviations, so we’ll specify an initial  $\phi$  of 0.00001. We chose this initial value by plotting 100 simulations  
135 from the exponential function in R (R Core Team 2020) under varying values of  $\phi$  [e.g., `plot(rexp(100,`  
136 `0.00001))`]. A value of 0.00001 generated an average deviance of  $\sim 1,000$  with values up to  $\sim 5,000$ , indicating  
137 the possibility of producing extremely large values.

138 After simulating from these initial priors, we specified successfully tighter priors (Table 1). We then simulated  
139 from the prior predictive distribution and compared those simulations to reference points representing prior  
140 knowledge (Mass of earth, a Blue Whale, a virus, and a Carbon-12 atom). The goal was to use these reference  
141 points to find a joint prior distribution that produced reasonable values of potential prey masses. We did  
142 this using two levels of the model ( $\mu_i$  and  $y_i$ ). For  $\mu_i$ , we simulated 100 means across each value of  $x_i$  and  
143 plotted them as regression lines. For  $y_i$ , we simulated a fake data set containing simulated values of log prey  
144 mass for each of the 13,085 values of log predator mass ( $x_i$ ) in the (Brose et al. 2006) data.

## 145 *Results*

146 Based on simulations from the prior predictive distribution, the weak “non-informative” priors make nonsense  
147 predictions (Figure 1a-c). In Figure 1a, all of the lines are impossibly steep, suggesting that predators could  
148 plausibly eat prey that are much larger than earth or much smaller than an atom. The seemingly stronger  
149 priors in Figure 1b suffer from the same problem, though the effect is less severe. The strongest priors  
150 (Figure 1c) produce more reasonable predictions, though they are still quite vague, with positive probability  
151 that large and small predators could eat prey that are orders of magnitude larger than an adult Blue Whale.  
152 The simulated fake data sets tell a similar story (Figure 1d-f), but with the added influence of *sigma* in the  
153 likelihood (Equation 6).

154 We fit the model using the strongest prior set (Figure 2). As is typical of models with large amounts of data,  
155 the parameters (i.e. slope, intercept, and sigma) are similar regardless of the prior distribution (Figure 2).  
156 The intercept is  $-4.8 \pm 0.04$  (mean  $\pm$  sd), the slope is  $0.6 \pm 0.01$ , and sigma is  $3.7 \pm 0.02$ .

157 Regardless of the similarity in results, there are several benefits to choosing a stronger prior. First, it is  
158 difficult to justify the two weakest priors on biological grounds. They place large amounts of prior probability  
159 on impossible values. This can matter, for example, when priors need to be justified to a granting agency

160 or to reviewers. More critically, specification of priors can have conservation or legal implications, and the  
161 ability to justify priors with simulation helps to improve transparency (Crome et al. 1996, Banner et al.  
162 2020). Stronger priors also improve computational efficiency (McElreath 2020). We fit these models using  
163 the *brms* package (Burkner 2017). The models with stronger or strongest priors were up to 50% faster than  
164 the model with weak priors, taking 56 vs 28 seconds on a standard laptop (compilation time + warmup time  
165 + sampling time). For more complex models that take longer to run, this improvement can save hours or  
166 days of computing time.

### 167 *Caveats*

168 In a real analysis, there are some other steps we could have taken to generate a more realistic prior distribution  
169 before fitting the model to data. First, we know from the literature that predators are generally larger than  
170 their prey by 2-3 orders of magnitude (Trebilco et al. 2013). Therefore, it would make sense to alter the  
171 prior mean of the intercept to a value below zero, perhaps using an average predator/prey mass comparison  
172 from the literature. That is apparent from the prior versus posterior comparison in Figure 2. Similarly, the  
173 fact that larger predators tend to eat larger prey is well-known, so the prior on the slope  $\beta$  could be changed  
174 to a positive mean. One option would be to restrict the slope to only positive values, but this would not  
175 reflect our prior knowledge that predator body size is still a noisy predictor of prey body size (e.g., whales  
176 and parasitoids have prey that are orders of magnitude smaller or larger than they are, respectively).

177 Part of the uncertainty in prior selection can also be minimized by standardizing predictors (McElreath  
178 2020). This changes the scale of each predictor so that the interpretation of its associated parameter is in  
179 units of standard deviation. In other words, a value of 2.3 for  $\beta$  would indicate that  $y$  increases by 2.3  
180 for every standard deviation increase in  $x$ . Standardizing predictors can prevent problems that arise by  
181 mistaking cm for m or ha for acres. It also limits the expected prior values (e.g.,  $N(0, 10)$  is extremely vague  
182 on a standardized predictor, but might be informative on a non-standardized predictor), but at the cost of  
183 less intuitive interpretation.

## 184 **Example 2: Spider Abundance - Generalized Linear Mixed Model**

### 185 *Data*

186 This data set comes from (Warmbold and Wesner 2018), who studied how terrestrial spiders responded to  
187 different combinations of freshwater fish using fish enclosure cages in a backwater of the Missouri River,  
188 USA. The hypothesized mechanism was that fish would reduce the emergence of adult aquatic insects by  
189 eating the insects, causing a reduction in terrestrial spiders that feed on the adult forms of those insects.  
190 The original experiment contained six treatments. Here, we present a simplified version comparing spider

191 abundance above three treatments that contain either Smallmouth Buffalo (*Ictiobus bubalus*), Green Sunfish  
192 (*Lepomis cyanellus*), or a fishless control. Each treatment had four replicates for a total of 12 cages (each  
193 2.3 m<sup>2</sup>). The number of occupied spider webs above each cage were counted on four dates over the 29-day  
194 experiment.

### 195 *Model*

196 We fit a generalized linear mixed model with a Poisson likelihood, since the response variable (# webs) is a  
197 non-negative integer (i.e. number of spiders counted above a cage on each date). The predictor variables were  
198 date, treatment, and a date x treatment interaction. Since each replicate cage was sampled four times, we  
199 included a random intercept for cages. Describing the model as having two main effects and an interaction  
200 is deceptively simple. In reality, the model has 13 parameters that require a prior specification: 11 “fixed”  
201 effects that indicate all combinations of date x treatment, plus 1 intercept and a hyperprior  $\phi$  on the intercept:

$$y_i \sim \text{Poisson}(\lambda_i) \quad (12)$$

$$\log(\lambda_i) = \alpha + \alpha_{[cage]} + \beta_1 x_{trt_i=fishless} + \beta_2 x_{trt_i=green} + \dots \beta_{11} x_{trt_i=green:date_i=4} \quad (13)$$

$$\alpha \sim \text{Normal}(0, \sigma_\alpha) \quad (14)$$

$$\alpha_{[cage_{1-12}]} \sim N(0, \sigma_{cage}) \quad (15)$$

$$\beta_{1\dots 11} \sim \text{Normal}(0, \sigma_{\beta_{1\dots 11}}) \quad (16)$$

$$\sigma_{cage} \sim \text{Exponential}(\phi) \quad (17)$$

202 where each  $y_i$  is described by a Poisson distribution with mean  $\lambda_i$ . Because the likelihood is not normal,  
203 we specify a log link -  $\log(\lambda_i)$  - so that the mean can be estimated as a linear function of predictors. This  
204 also ensures that the mean will be a positive number, preventing the model from predicting negative spider  
205 abundance. In this model, the intercept  $\alpha$  represents the predicted log mean number of spiders in the  
206 treatment with Smallmouth Buffalo on the first sample date. The choice of reference treatment is arbitrary.  
207 Choosing Smallmouth Buffalo and the first date as the intercept is the default choice in R (R Core Team  
208 2020) because the treatment is coded first alphabetically (“buffalo”) and first numerically (“2015-06-08”).

### 209 *Priors*

210 As before, we simulated outcomes under three model scenarios, each with different priors (Table 1; Figure  
211 3a-c). Another complication in this model is the log-link, which changes the biological interpretation of  
212 the priors. With a log-link the individual model parameters are less intuitive than they would be under a



213 normal likelihood (Bedrick et al. 1996). Under a normal likelihood, a  $\beta_1 x_{trt_i=fishless}$  value of 1.5 would  
214 indicate that the fishless treatment on 2020-06-08 contains 1.5 more spiders on average than the Smallmouth  
215 Buffalo treatment on the same date. With a Poisson likelihood and log-link, the same value first needs to  
216 be exponentiated  $exp(1.5) = 4.5$  and then interpreted as a multiplier. Thus, a value of 1.5 for the parameter  
217 indicates that the fishless treatment contains 4.5 *times* more spiders than the Smallmouth Buffalo treatment  
218 on the first sample date. A value of 10 results in 22,026 times more spiders. This is an example of the  
219 principle that the prior can only be understood in the context of the likelihood (Gelman et al. 2017).

## 220 *Results*

221 If all we knew was that spiders were counted above 2.32 m<sup>2</sup> cages but we did not know anything else about  
222 the experiment (i.e. the ecosystem, the question, the spider taxa), then we could still use the prior predictive  
223 distribution to select more informative priors. The weakest priors place substantial probabilities on values  
224 of >100,000 spiders per cage *on average* (Figure 3a), and include a small number of predictions on the  
225 final sample date with more than 100 million spiders (Figure 3c). We looked up the range of spider masses  
226 (~0.0005 to 170 grams). If we assume our spiders are relatively small, say 0.01 grams, then 100 million  
227 spiders would equal 30 tons of spiders. This is approximately equal to the mass of ~6 adult hippopotamus's  
228 (each ~4 tons).

229 However, in this case we do have valuable prior information. In a previous study using the same cages in the  
230 same backwater, (Warmbold 2016) counted between 0 and 2 spiders per cage. The present experiment had  
231 a slightly different design, in which a small rope was added to the center of each cage to increase the area of  
232 attachment (Warmbold and Wesner 2018). If we assume that the rope will double the number of spiders that  
233 could colonize, then it seems reasonable to expect ~ 4 spiders per cage. There is obvious error associated  
234 with this, since the experiment was conducted in a different year and a different month. For that reason, we  
235 chose the moderate prior (Figure 3b,d) to use in the final model. It places most of the prior probability on  
236 values between ~1 to 100 spiders, but also allows for some extreme possibilities of >1000 spiders per cage  
237 (Figure 3d). The strongest priors also appear reasonable, placing most of the prior probability between ~1  
238 to 10 spiders, while allowing for up to ~100 spiders in extreme cases (Figure 3c,e).

239 Figure 3 shows the results after fitting the model to data. Spider counts ranged from 0 to 5 spiders per cage  
240 (Figure 4a), resulting in mean spider densities of ~1 to 4 spiders among the date x treatment combinations  
241 (Figure 4a). Simulating from the prior and posterior predictive distributions shows the model predictions  
242 for the number of spiders we might expect at a new cage (i.e. a cage sampled from this site at another time).  
243 Before seeing the data, the model suggested reasonable probabilities of collecting 10 to >100 spiders. After  
244 seeing the data, the model suggests that finding ~10 or more spiders would be surprising (Figure 4b).

245 In addition to the computational and logical benefits of stronger priors as mentioned above, the stronger  
246 prior specifications in this model have a clear influence on the posterior (Figure S1). In particular, the  
247 stronger prior used in the model is more conservative, pulling the posterior means away from extreme high  
248 or low values. As such it acts to prevent overconfidence in large or small effect sizes (e.g., Type M errors)  
249 (Lemoine 2019). This skepticism of stronger priors is a benefit that is most apparent with small sample  
250 sizes, which are common in ecological studies.

### 251 *Caveats*

252 Each of the 11  $\beta$ 's was assigned an independent prior. An alternative approach would be to assign  $\beta$  priors  
253 from a multivariate normal distribution (Hobbs and Hooten 2015). In addition, the likelihood assumes that  
254 the variance is equal to the mean. An alternative likelihood, such as a negative binomial, would allow us to  
255 model variances independently. Finally, the strongest priors we specified overwhelmed the small data set,  
256 pulling all treatments towards the same mean, regardless of the data (Figure S1). Whether that is a problem  
257 or not depends on how skeptical we are that the cages or treatments would have different numbers of spiders.

### 258 **Discussion**

259 Bayesian statistics is increasingly used by ecologists (Ellison 2004, McCarthy and Masters 2005, Hooten and  
260 Hobbs 2015, Touchon and McCoy 2016), yet the preponderance of studies continue to rely on diffuse and/or  
261 default priors (Lemoine 2019, Banner et al. 2020). Using two case studies with a linear regression and a  
262 generalized linear mixed model - two common types of models in ecology (Touchon and McCoy 2016) - we  
263 demonstrated how visualization on the scale of the outcome can improve our choices of priors on individual  
264 parameters in a Bayesian analysis. From our own experience teaching Bayesian statistics to graduate students  
265 (JSW) and the experiences of others (James et al. 2010, Gabry et al. 2019), we suspect that this approach  
266 will help to remove confusion or anxiety over choosing more informative priors by aligning the choices more  
267 closely to the domain expertise of the users (Bedrick et al. 1996, James et al. 2010).

268 Choosing priors based on their implications on the outcome scale is not new. Kadane et al. (1980) described  
269 a similar approach with normal linear regressions to elicit prior information from experts, and (Bedrick et  
270 al. 1996) expanded it to generalized linear models. More recently, (Gabry et al. 2019) used it in a model  
271 with random effects to measure global air quality. (Kennedy et al. 2019) used a similar approach for models  
272 in cognitive science. A primary difference between the earlier and later uses of prior predictive simulation is  
273 the improvement in visualization techniques (Gabry et al. 2019), which makes it easier evaluate prior choices  
274 on a visual *distribution* of outcome measures, rather than only point estimates.

275 Assessing and visualizing priors on the outcome scale of a model makes clear what many current Bayesian

276 approaches emphasize: it is almost never the case that we have absolutely zero prior information (Hobbs  
277 and Hooten 2015, Lemoine 2019, Banner et al. 2020). For example, it does not take expertise in ecology  
278 or in predator-prey interactions to know that predators cannot eat prey larger than earth, yet this type of  
279 impossible prior belief is exactly what many Bayesian models encode with non-informative priors. It *does*  
280 take ecological expertise to know whether it is more probable for predators to eat prey that are 2 times larger  
281 or 2 times smaller, or whether the log-linear model should have a different functional form (e.g., non-linear).  
282 Critiquing priors in this way would, we argue, lead to a much better use of Bayesian methods than current  
283 practices that focus on finding the least informative prior (Lemoine 2019, Banner et al. 2020). Even for  
284 models with more abstract outcomes than body size (e.g., gene methylation, stoichiometric ratios, pupation  
285 rates of a new insect species), it is almost always the case that ecologists have some sense of what reasonable  
286 measures might be. After all, it would be impossible to do any sort of study without first knowing what  
287 we will measure. Prior expectations of those measures come either from prior experience, the literature, or  
288 most often, both.

289 Visualizing simulations from the prior predictive distribution represents one aspect of the overall Bayesian  
290 modeling workflow (Kennedy et al. 2019, Gelman et al. 2020, Schad et al. 2020, Gabry et al. 2019). Like any  
291 approach to data analysis, the Bayesian workflow involves iteratively checking assumptions and implications  
292 of our model, from data collection and model design to prior choices and model inference (Hooten and Hobbs  
293 2015, Gelman et al. 2020). Traditionally, the role of priors in this workflow has focused on choosing the least  
294 informative priors possible, leading to a large body of theoretical and applied literature on development of  
295 non-informative priors, such as Jeffrey's, Horseshoe, or flat priors (Hobbs and Hooten 2015). When prior  
296 criticism is used, it is usually done after the model is fit with prior sensitivity analyses and/or plots of prior  
297 versus posterior parameters (Korner-Nievergelt et al. 2015). The approach we demonstrate does not obviate  
298 the need for these techniques in any sense. Rather, it adopts the approaches that are generally reserved for  
299 exploring the implications of the posterior distribution and applies them to the prior distribution. In doing  
300 so, it helps to lessen the impact of poor prior distributions later in the analysis workflow.

301 In ecology, the most closely related application of the approach we describe is for eliciting prior information  
302 from a panel of experts (James et al. 2010). However, external elicitation is not practical for most ecological  
303 studies, because the data analyst is often also the domain expert (Ellison and Dennis 2010). In other words,  
304 most statistical analysis in ecology is done by people (such as us) that are trained in disciplines other than  
305 statistics (Touchon and McCoy 2016). As a result, Bayesian analysis in ecology has traditionally been limited  
306 to ecologists with advanced statistical and computing capabilities. This is in part because Bayesian analysis  
307 is not included by default in popular statistical software, such as R (R Core Team 2020), and also because

308 of the large computing time needed to run Bayesian models relative to frequentist or maximum likelihood  
309 approaches. Yet recent improvements in both the MCMC algorithms (Gelman et al. 2015) and the packages  
310 used to fit models appear likely to continue the trend of ecologists using Bayesian statistics. For example,  
311 with the *brms* package in R (Burkner 2017), this frequentist linear regression - `lm(y ~ x, data = data)`  
312 - becomes this Bayesian regression by changing two letters - `brm(y ~ x, data = data)`. This represents  
313 the simplest of cases (priors can and should be specified in the `brm()` model), but demonstrates the ease  
314 with which fitting Bayesian models is now possible.

315 An added benefit to choosing more informative priors is that it reduces the computational time needed  
316 to fit models, because it limits the parameter space that an MCMC algorithm needs to explore. In the  
317 relatively simple models we used here, the computational improvements are likely minimal. But ecologists  
318 are using increasingly sophisticated models (Touchon and McCoy 2016), for which the improvements in  
319 computational efficiency are likely to be important. An irony in this improvement is that it contradicts  
320 a common justification of using non-informative priors to “let the data speak for themselves”. In a model  
321 with such priors, much of the “speaking” is done by the priors in the sense of sampling parameter spaces  
322 that are incompatible with reasonable data. More importantly, as shown by the first analysis here and by  
323 (Gabry et al. 2019), non-informative priors on parameters can become informative for quantities of interest  
324 (e.g., average prey sizes that are larger than earth). To rearrange the statement, data can only speak for  
325 themselves if the microphone is properly tuned.

## 326 **Acknowledgements**

327 This material is based upon work supported by the National Science Foundation under Grant No. 1837233.  
328 JSW thanks the students in his graduate Bayesian class for asking challenging questions. He hopes this  
329 manuscript provides a long overdue answer. We thank (Brose et al. 2006) for making their data publicly  
330 available.

## 331 **References**

- 332 Banner, K. M., K. M. Irvine, and T. J. Rodhouse. 2020. The use of Bayesian priors in Ecology: The good,  
333 the bad and the not great. *Methods in Ecology and Evolution* 11:882–889.
- 334 Bedrick, E. J., R. Christensen, and W. Johnson. 1996. A new perspective on priors for generalized linear  
335 models. *Journal of the American Statistical Association* 91:1450–1460.
- 336 Brose, U., T. Jonsson, E. L. Berlow, P. Warren, C. Banasek-Richter, L.-F. Bersier, J. L. Blanchard, T. Brey,

- 337 S. R. Carpenter, M.-F. C. Blandenier, and others. 2006. Consumer–resource body-size relationships in  
338 natural food webs. *Ecology* 87:2411–2417.
- 339 Burkner, P.-C. 2017. Brms: An R Package for Bayesian Generalized Linear Mixed Models using Stan:22.
- 340 Crome, F., M. Thomas, and L. Moore. 1996. A novel Bayesian approach to assessing impacts of rain forest  
341 logging. *Ecological Applications* 6:1104–1123.
- 342 Edwards, W., H. Lindman, and L. J. Savage. 1963. Bayesian statistical inference for psychological research.  
343 *Psychological review* 70:193.
- 344 Ellison, A. M. 2004. Bayesian inference in ecology. *Ecology letters* 7:509–520.
- 345 Ellison, A. M., and B. Dennis. 2010. Paths to statistical fluency for ecologists. *Frontiers in Ecology and the*  
346 *Environment* 8:362–370.
- 347 Gabry, J., D. Simpson, A. Vehtari, M. Betancourt, and A. Gelman. 2019. Visualization in Bayesian workflow.  
348 *Journal of the Royal Statistical Society: Series A (Statistics in Society)* 182:389–402.
- 349 Gelman, A., J. B. Carlin, H. S. Stern, D. B. Dunson, A. Vehtari, and D. B. Rubin. 2013. *Bayesian data*  
350 *analysis*. CRC press.
- 351 Gelman, A., and C. Hennig. 2017. Beyond objective and subjective in statistics (with discussion). *Journal*  
352 *of the Royal Statistical Society, Series A* 180:967–1033.
- 353 Gelman, A., J. Hill, and M. Yajima. 2012. Why we (usually) don’t have to worry about multiple comparisons.  
354 *Journal of Research on Educational Effectiveness* 5:189–211.
- 355 Gelman, A., D. Lee, and J. Guo. 2015. Stan: A probabilistic programming language for Bayesian inference  
356 and optimization. *Journal of Educational and Behavioral Statistics* 40:530–543.
- 357 Gelman, A., and others. 2006. Prior distributions for variance parameters in hierarchical models (comment  
358 on article by Browne and Draper). *Bayesian analysis* 1:515–534.
- 359 Gelman, A., D. Simpson, and M. Betancourt. 2017. The Prior Can Often Only Be Understood in the  
360 Context of the Likelihood. *Entropy* 19:555.
- 361 Gelman, A., A. Vehtari, D. Simpson, C. C. Margossian, B. Carpenter, Y. Yao, L. Kennedy, J. Gabry, P.-C.  
362 Bürkner, and M. Modrák. 2020. Bayesian workflow. arXiv preprint arXiv:2011.01808.
- 363 Hobbs, N. T., and M. B. Hooten. 2015. *Bayesian models: A statistical primer for ecologists*. Princeton  
364 University Press.

- 365 Hooten, M. B., and N. T. Hobbs. 2015. A guide to Bayesian model selection for ecologists. *Ecological*  
366 *Monographs* 85:3–28.
- 367 James, A., S. L. Choy, and K. Mengersen. 2010. Elicitor: An expert elicitation tool for regression in  
368 ecology. *Environmental Modelling & Software* 25:129–145.
- 369 Kadane, J. B., J. M. Dickey, R. L. Winkler, W. S. Smith, and S. C. Peters. 1980. Interactive elicitation of  
370 opinion for a normal linear model. *Journal of the American Statistical Association* 75:845–854.
- 371 Kennedy, L., D. Simpson, and A. Gelman. 2019. The Experiment is just as Important as the Likelihood in  
372 Understanding the Prior: A Cautionary Note on Robust Cognitive Modeling. *Computational Brain &*  
373 *Behavior* 2:210–217.
- 374 Korner-Nievergelt, F., T. Roth, S. Von Felten, J. Guélat, B. Almasi, and P. Korner-Nievergelt. 2015.  
375 Bayesian data analysis in ecology using linear models with R, BUGS, and Stan. Academic Press.
- 376 Lemoine, N. P. 2019. Moving beyond noninformative priors: Why and how to choose weakly informative  
377 priors in Bayesian analyses. *Oikos* 128:912–928.
- 378 Lindley, D. V. 1961. The use of prior probability distributions in statistical inference and decision. Pages  
379 453–468 *in Proc. 4th Berkeley Symp. On Math. Stat. And Prob.*
- 380 McCarthy, M. A., and P. Masters. 2005. Profiting from prior information in Bayesian analyses of ecological  
381 data. *Journal of Applied Ecology*:1012–1019.
- 382 McElreath, R. 2020. *Statistical rethinking: A Bayesian course with examples in R and Stan*. CRC press.
- 383 Morris, W. K., P. A. Vesk, M. A. McCarthy, S. Bunyavejchewin, and P. J. Baker. 2015. The neglected  
384 tool in the Bayesian ecologist’s shed: A case study testing informative priors’ effect on model accuracy.  
385 *Ecology and Evolution* 5:102–108.
- 386 R Core Team. 2020. *R: A Language and Environment for Statistical Computing*. R Foundation for Statistical  
387 Computing, Vienna, Austria.
- 388 Rodhouse, T. J., R. M. Rodriguez, K. M. Banner, P. C. Ormsbee, J. Barnett, and K. M. Irvine. 2019. Evi-  
389 dence of region-wide bat population decline from long-term monitoring and Bayesian occupancy models  
390 with empirically informed priors. *Ecology and evolution* 9:11078–11088.
- 391 Schad, D. J., M. Betancourt, and S. Vasishth. 2020. Toward a principled Bayesian workflow in cognitive  
392 science. *Psychological methods*.

- 393 Seaman III, J. W., J. W. Seaman Jr, and J. D. Stamey. 2012. Hidden dangers of specifying noninformative  
394 priors. *The American Statistician* 66:77–84.
- 395 Touchon, J. C., and M. W. McCoy. 2016. The mismatch between current statistical practice and doctoral  
396 training in ecology. *Ecosphere* 7:e01394.
- 397 Trebilco, R., J. K. Baum, A. K. Salomon, and N. K. Dulvy. 2013. Ecosystem ecology: Size-based constraints  
398 on the pyramids of life. *Trends in Ecology & Evolution* 28:423–431.
- 399 Warmbold, J. 2016. Effects of fish on aquatic and terrestrial ecosystems. University of South Dakota.
- 400 Warmbold, J. W., and J. S. Wesner. 2018. Predator foraging strategy mediates the effects of predators on  
401 local and emigrating prey. *Oikos* 127:579–589.
- 402 Wolf, C., M. Novak, and A. I. Gitelman. 2017. Bayesian characterization of uncertainty in species interaction  
403 strengths. *Oecologia* 184:327–339.

404 **Tables**

Table 1: Priors used for the two models. Distributions are either normal with a mean and standard deviation [N( $\mu$ ,  $\sigma$ )] or exponential [Exp(rate)].

| Parameter   | Model 1: Predator-Prey |           |           | Model 2: Spiders |        |           |
|-------------|------------------------|-----------|-----------|------------------|--------|-----------|
|             | Weak                   | Strong    | Strongest | Weak             | Strong | Strongest |
| Alpha       | N(0,1000)              | N(0,10)   | N(0,1)    | N(0,10)          | N(0,1) | N(0,0.1)  |
| Beta(s)     | N(0,1000)              | N(0,10)   | N(0,1)    | N(0,10)          | N(0,1) | N(0,0.1)  |
| Sigma       | Exp(0.001)             | Exp(0.01) | Exp(0.1)  |                  |        |           |
| Sigma_alpha |                        |           |           | Exp(0.1)         | Exp(1) | Exp(2)    |
| Sigma_cage  |                        |           |           | Exp(0.1)         | Exp(1) | Exp(2)    |



405 **Figures**

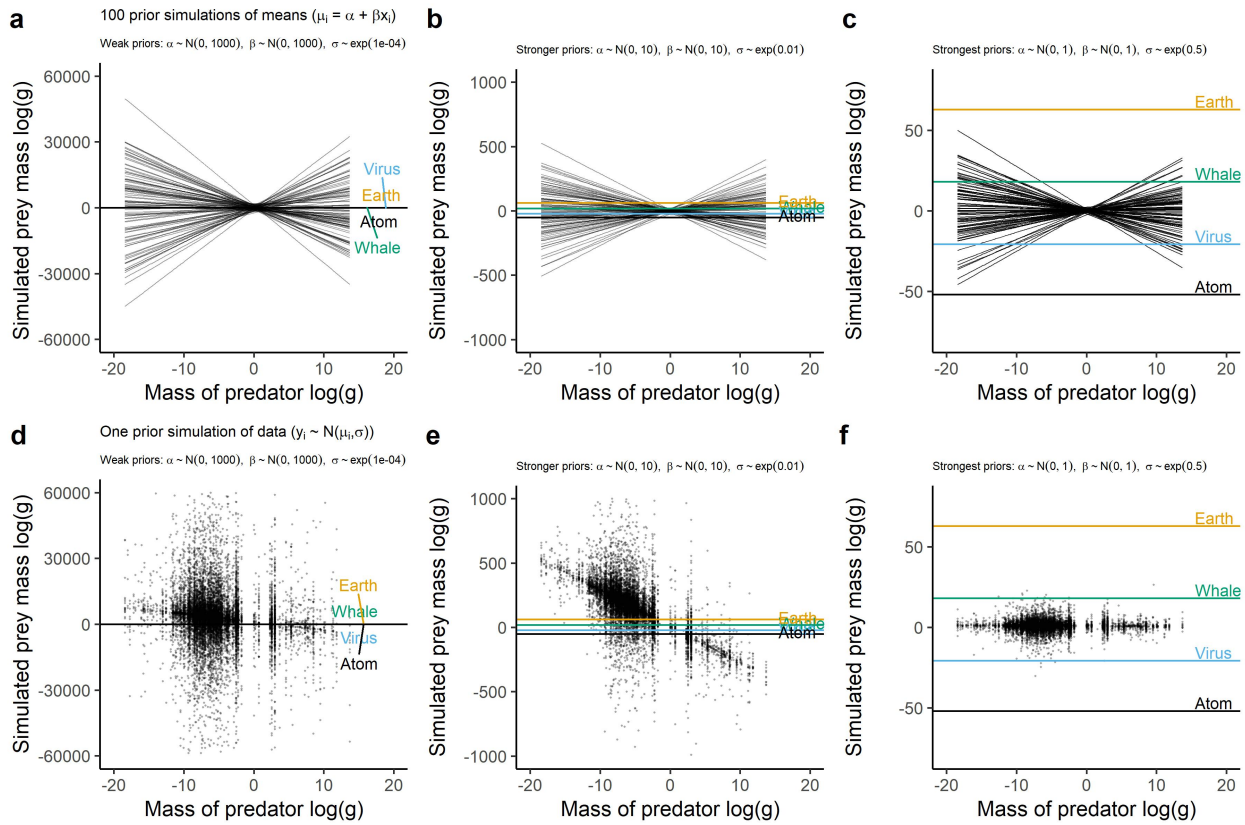

Figure 1: Prior predictive simulations showing the implications of the priors on predictions of log prey mass. The top row (a-c) shows prior simulations of regression lines. The bottom row (d-f) shows prior predictive simulation of one dataset.

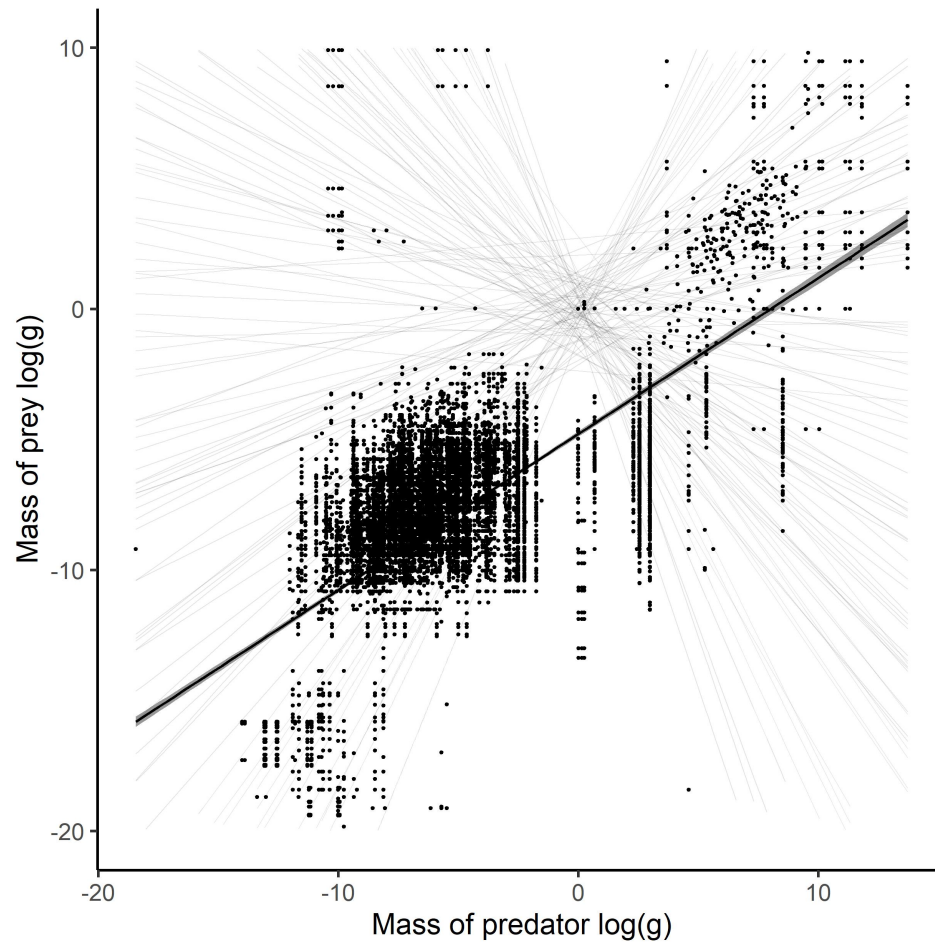

Figure 2: The fitted model showing the posterior distribution of the regression and raw data points from Brose et al. 2006. The shaded lines in the background are prior predictions from the strongest priors.

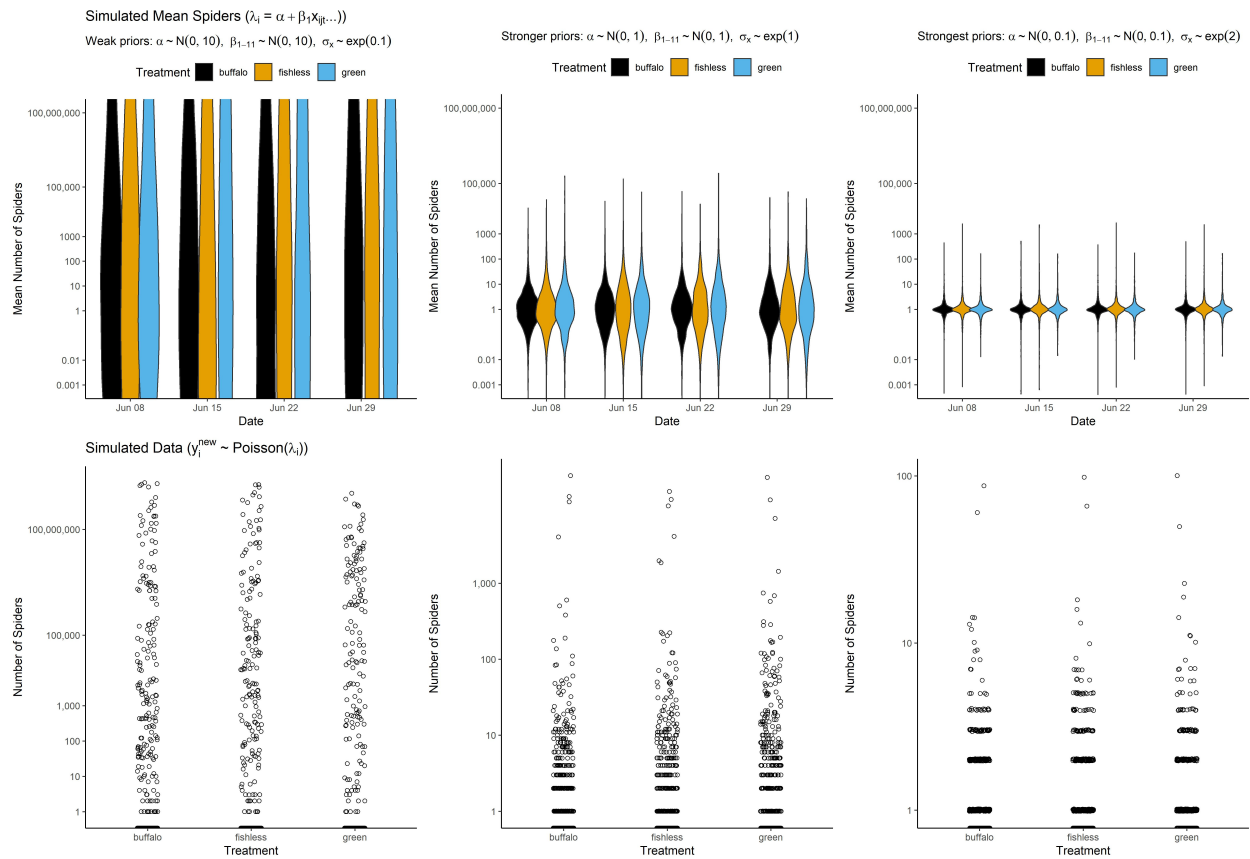

Figure 3: Prior predictive simulations showing the implications of the priors on spider densities above mesocosm cages. Top row: Prior predictive distribution of the number of the mean number of spiders above treatments with either Smallmouth Buffalo, no fish, or Green Sunfish. a) wide priors ( $\sigma_{\alpha/\beta} = 10, \phi = 0.1$ ), b) stronger priors ( $\sigma_{\alpha/\beta} = 1, \phi = 1$ ), or c) the strongest priors ( $\sigma_{\alpha/\beta} = 0.1, \phi = 2$ ). Bottom row: 500 simulations from the prior predictive distribution of the total number of spiders expected for a new cage. Simulations come from the same priors as described above as d) wide priors, e) stronger priors, and f) the strongest priors. To improve visualization, the y-axis for a) is clipped at 0.001 and 1e9.

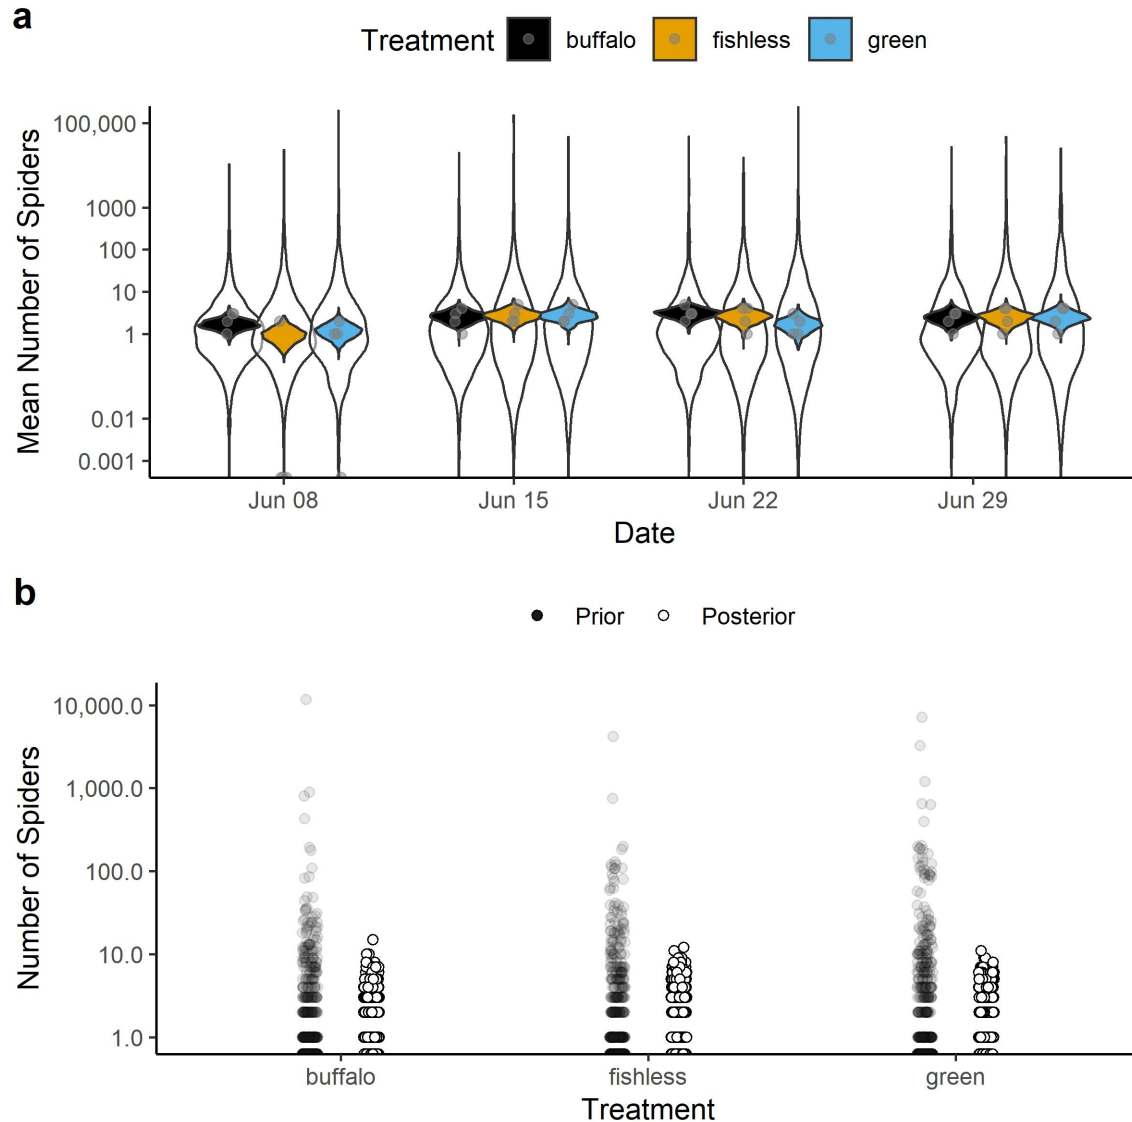

Figure 4: Comparison of the prior and posterior distributions for a) mean number of spiders and b) the conditional prediction of the number of spiders predicted for a new cage from each date x treatment combination. Each violin plot in (a) shows either the prior (white) or posterior (color) distribution with dots as raw data. Each dot in (b) is a simulation ( $n = 500$ ) of the total number of spiders predicted for a single new cage in each date x treatment combination. The prior is taken from the strong prior in Figure 4b. It is clear that a large amount was learned from the data, as evidenced by the difference between the prior and posterior distributions in both panels.

406 **Supplementary Information**

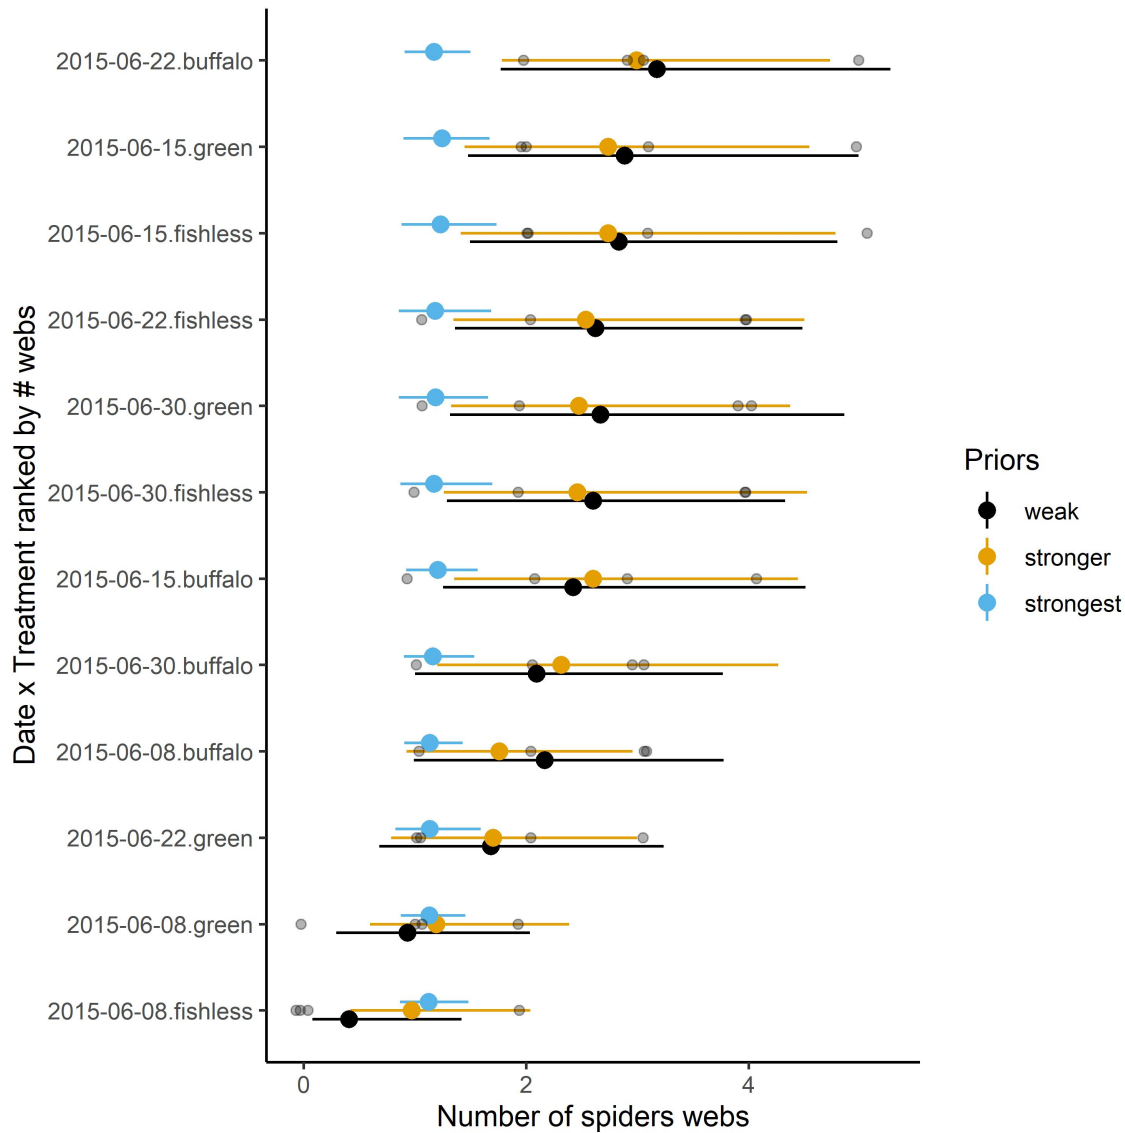

407

408 Figure S1. The influence of the prior distributions. Because of the small sample size ( $n = 4$  replicates),  
409 the prior specifications affect the posterior. Compared to the weakest prior, the stronger prior is more  
410 conservative, pulling each mean towards the prior mean. The strongest prior (blue) essentially overcomes  
411 any information in the data. Gray dots are raw data.
